# Supplementary material for: B Cells Improve Overall Survival in HPV-Associated Squamous Cell Carcinomas and Are Activated by Radiation and PD-1 Blockade
Source: Oxford University Press journal article supplement (doi:10.1158/1078-0432.ccr-19-3211), 2020-03-19
Supplement: 10780432ccr193211-sup-229939_2_supp_6137601_q6pgw1.xlsx [file 10780432ccr193211-sup-229939_2_supp_6137601_q6pgw1.xlsx]

## Sheet: Supplement - Cluster 1 vs 2
Gene Name	p_val	avg_logFC
Il4i1	4.11719e-33	0.671645
Cd83	4.82263e-31	0.548919
Apoe	2.50086e-06	0.34476
Ifi27l2a	4.02482e-15	0.339265
Pold4	2.61557e-100	0.328791
Ftl1	2.78198e-97	0.319389
Pafah1b3	1.66075e-10	0.296502
Lipc	4.65383e-17	0.266093
Bfsp2	2.47638e-16	0.263218
Mzb1	1.55278e-53	0.261963
Sp140	6.65064e-38	0.258302
Hpse	8.12911e-14	0.256006
Golgb1	6.84009e-09	0.254799
Ubap2	3.38268e-78	-0.250045
Anapc11	1.51864e-64	-0.25008
Prim2	7.61046e-110	-0.250255
Ercc6l	1.11813e-138	-0.251517
Eif4g1	8.43068e-55	-0.254048
Srsf4	3.78478e-81	-0.254954
Syce2	6.10226e-89	-0.255997
Ube2t	2.3566e-109	-0.256665
Chaf1b	7.36362e-94	-0.256721
Hspa14	1.09621e-68	-0.257927
Nudt21	1.38119e-77	-0.258909
Pold3	1.79596e-90	-0.259966
Snrpf	8.72677e-69	-0.261408
Pcbp1	2.00577e-77	-0.262831
Sdf2l1	2.45877e-79	-0.263916
Hnrnpul1	1.50151e-75	-0.264081
Ppil1	1.94249e-91	-0.264308
Gsg2	2.29096e-137	-0.265317
Prdx4	3.45388e-102	-0.265873
Mif	1.46328e-34	-0.267126
Stip1	1.56236e-76	-0.267198
Rps2	2.55315e-61	-0.26722
Chek1	7.2251e-112	-0.2675
Nhp2l1	4.1024e-66	-0.269145
Gspt1	9.57993e-69	-0.269261
Rnaseh2b	2.22983e-89	-0.269317
Nop58	3.90566e-57	-0.269621
Eif1ad	6.89105e-119	-0.269638
Suv39h1	1.56046e-116	-0.269875
Raly	3.11134e-81	-0.270938
Psmc3ip	2.10911e-123	-0.271196
Ccnb2	1.97925e-89	-0.27185
Cdc20	9.00572e-89	-0.273262
Rfc1	9.20988e-71	-0.274021
Mrpl51	3.81255e-73	-0.274288
Cdkn2c	8.98849e-107	-0.27582
Kif2c	1.27558e-135	-0.275986
E2f1	4.22959e-62	-0.276514
Aars	1.79685e-76	-0.276592
Pdap1	4.86399e-67	-0.276768
Foxm1	2.04122e-99	-0.276877
Rbbp8	2.7606e-114	-0.277227
Xpo1	1.46595e-84	-0.277835
Tkt	1.41083e-62	-0.278036
Rad50	5.28779e-79	-0.278085
Tubg1	2.34257e-117	-0.278254
Msh6	1.95999e-77	-0.278678
E2f2	1.05243e-82	-0.278752
Nek2	2.97898e-116	-0.279705
U2af1	1.31594e-83	-0.281028
Pole	6.41238e-109	-0.281569
Cenpn	1.26783e-116	-0.282034
Rfwd3	4.77691e-91	-0.283332
Tcerg1	1.74014e-78	-0.283366
Ccdc18	1.4071e-104	-0.283454
Rpa3	2.02497e-81	-0.284357
Ppm1g	4.3453e-74	-0.28437
Naa50	2.13412e-77	-0.28464
Uchl5	1.25879e-86	-0.284785
Serbp1	8.61648e-101	-0.289532
Diaph3	9.65913e-120	-0.290686
Paxip1	4.57823e-130	-0.290969
Nme1	3.01363e-55	-0.291494
Hnrnpu	6.19778e-93	-0.292634
Ywhah	2.28118e-90	-0.29309
Rbmxl1	7.73793e-82	-0.29318
Psat1	1.8693e-91	-0.293554
Nmral1	2.76744e-97	-0.294638
Dlgap5	2.23686e-107	-0.294832
Txnl1	1.26826e-80	-0.295508
Spdl1	2.49819e-121	-0.296394
Cdkn2d	5.31781e-65	-0.296504
Nono	1.20811e-91	-0.296753
Ccne2	1.34323e-87	-0.297156
Ppia	1.46216e-167	-0.298558
Eif5a	1.31164e-71	-0.29904
Ptbp1	1.02451e-89	-0.300735
Rpa1	1.31258e-89	-0.301109
Mns1	5.85452e-147	-0.301954
Pcna-ps2	3.60347e-107	-0.303022
Spag5	3.49668e-117	-0.303252
Hnrnpa2b1	3.09235e-111	-0.304026
Exo1	2.79829e-154	-0.305492
Hn1	2.27431e-55	-0.306542
Cenpk	1.97306e-150	-0.306668
Eif1ax	9.23138e-91	-0.308034
Mthfd2	4.50216e-91	-0.310889
Tuba1c	1.72559e-77	-0.311063
Magoh	4.65591e-91	-0.312077
Ung	1.36043e-29	-0.312366
Ccne1	2.08046e-147	-0.313455
Hprt	1.92558e-92	-0.313644
Rbl1	1.28558e-126	-0.313992
Haus4	1.54354e-150	-0.314538
Paics	1.21761e-90	-0.315399
Oxct1	1.03976e-91	-0.316639
Brip1	1.84994e-125	-0.318735
Ncaph2	3.86912e-109	-0.318948
Fkbp4	1.04426e-87	-0.319276
Ndc1	1.12724e-125	-0.321933
Lsm5	3.22067e-101	-0.323406
Snrpe	4.12748e-144	-0.325129
Hmgb3	3.36214e-117	-0.327713
Ttk	8.96071e-156	-0.327999
Hspd1	1.94465e-47	-0.328308
Rad54l	9.28592e-132	-0.328576
Hnrnpd	1.97238e-109	-0.328909
Ipo5	2.2408e-107	-0.329111
Cmc2	6.42795e-100	-0.329417
Bard1	2.5218e-199	-0.329828
Exosc8	4.9648e-112	-0.330018
Ska1	3.19753e-184	-0.332064
Aurka	3.78844e-109	-0.333843
Ly6e	5.67363e-71	-0.334463
Lsm8	1.94396e-102	-0.334635
Pbrm1	4.5458e-94	-0.334838
Lrr1	2.90412e-138	-0.335849
Nsmce4a	1.64715e-105	-0.335974
Lyar	1.4769e-72	-0.335988
Prdx1	1.6527e-100	-0.336343
Smarca5	1.1867e-102	-0.337928
Nup62	1.28708e-120	-0.33839
H2afy	1.95797e-119	-0.340867
Hist1h1d	3.88775e-126	-0.340995
Cenpw	1.56208e-133	-0.341016
Hjurp	1.95755e-122	-0.341398
Samd1	2.24658e-107	-0.342488
Sumo3	1.9637e-106	-0.343253
Setd8	8.42332e-116	-0.34362
Aspm	5.09294e-75	-0.344045
Fignl1	1.17558e-141	-0.345241
Uba2	2.67976e-101	-0.345692
Erh	2.83417e-117	-0.347277
Hmgn1	2.75791e-144	-0.347476
Cenph	4.05637e-131	-0.349121
Ctcf	3.27154e-81	-0.349587
Ybx3	1.19814e-75	-0.351539
Nxt1	2.37768e-126	-0.352169
Impdh2	7.57248e-100	-0.353021
Stra13	9.25005e-117	-0.35437
Npm1	5.20169e-93	-0.355437
Rcc1	2.33797e-124	-0.355696
Set	7.39061e-115	-0.356927
Actn4	1.96887e-118	-0.357235
Hist1h1c	1.04994e-72	-0.358866
Ncl	1.16231e-98	-0.359898
Tuba1a	7.06692e-71	-0.36016
Phgdh	1.37597e-85	-0.361049
Srsf3	4.13286e-140	-0.361576
Psip1	1.53517e-110	-0.361799
Banf1	1.67936e-111	-0.362553
Lsm3	1.72714e-121	-0.363604
Baz1b	2.63524e-90	-0.367148
Snrpb	3.81705e-135	-0.367416
Hist1h4d	1.34694e-161	-0.367593
Kpnb1	1.07262e-117	-0.368167
Maz	2.74847e-125	-0.373077
Ccnb1	1.67796e-125	-0.375568
Pcna	9.79719e-118	-0.376121
Anp32b	1.92039e-175	-0.376923
Gins2	8.07121e-159	-0.377044
Lbr	9.27166e-103	-0.378395
H1fx	1.54712e-75	-0.380797
Cdca5	2.12074e-144	-0.381176
Cep55	3.6672e-156	-0.381616
Bub1	6.34041e-179	-0.384499
Cdc6	3.79992e-116	-0.385521
Cdk4	1.73055e-103	-0.386633
Rpa2	1.17297e-131	-0.387328
Tcf19	4.66474e-125	-0.388425
Mxd3	4.59553e-126	-0.389464
Hint1	2.21594e-130	-0.39012
Ppp1cc	1.9505e-131	-0.392411
Kif18a	1.81239e-133	-0.393443
Hspa8	6.25219e-170	-0.39486
Mcm10	1.37378e-153	-0.395367
Mrpl18	9.59785e-137	-0.396606
Ccnf	4.736e-179	-0.400693
Ckap5	2.94419e-119	-0.400734
Snrpa1	1.03571e-122	-0.404017
Topbp1	2.94934e-133	-0.407534
Kpna2	9.69825e-131	-0.408865
Eri1	2.13386e-133	-0.412933
Nudc	2.68799e-131	-0.414735
Ptges3	9.64421e-125	-0.415039
Hnrnpa3	1.34655e-160	-0.415092
Dtymk	4.77762e-141	-0.417603
Pgp	1.14017e-132	-0.420136
Lsm2	2.0555e-136	-0.423437
Arhgap11a	8.54636e-145	-0.425983
Smc3	5.56837e-126	-0.427477
Cdca7	8.07057e-98	-0.430067
Casp8ap2	2.13983e-99	-0.430164
Mad2l1	2.27324e-155	-0.431698
Rangap1	6.32048e-131	-0.431783
Sgol1	2.18596e-186	-0.432489
Dbf4	9.73816e-129	-0.43305
Mcm2	1.66704e-110	-0.436394
Ybx1	4.0355e-177	-0.437665
Hist1h1a	9.2072e-155	-0.438944
Suz12	2.73883e-143	-0.439206
Wdr76	1.4301e-151	-0.439338
Mybl2	2.11858e-179	-0.439484
Rfc2	1.73905e-138	-0.441053
Plk4	2.15127e-193	-0.442067
Pola1	1.8271e-157	-0.444406
Tacc3	1.1416e-184	-0.446309
Srsf2	4.22359e-148	-0.44646
Shcbp1	6.06276e-191	-0.448229
Sumo2	1.60861e-197	-0.448359
Smarcc1	5.10687e-142	-0.452079
Nelfe	1.4359e-179	-0.455025
Pa2g4	6.00658e-132	-0.457129
Ndc80	1.64835e-210	-0.4595
Rad51	1.9657e-185	-0.462603
Hdgf	8.77019e-138	-0.464455
Dtl	1.95876e-124	-0.46612
Rfc3	7.55868e-153	-0.468167
Anapc5	2.21733e-165	-0.46897
Rbbp4	1.36899e-163	-0.470517
Rif1	2.76464e-136	-0.472653
Rfc5	2.66191e-186	-0.473873
Cdc45	1.44696e-193	-0.476948
Nuf2	1.94238e-171	-0.479634
Kif4	8.81943e-164	-0.480103
2700029M09Rik	1.19453e-163	-0.48047
Kif22	2.66481e-186	-0.481042
Srsf7	9.90405e-175	-0.48266
Cbx3	2.63825e-170	-0.484161
Plk1	7.4993e-154	-0.485576
Pbk	1.41163e-221	-0.486705
Brca1	3.2558e-234	-0.490525
Ncaph	8.76402e-228	-0.491819
2700094K13Rik	3.66624e-159	-0.494577
Hat1	7.69291e-184	-0.496365
Neil3	4.67751e-173	-0.499749
Anp32e	1.03132e-150	-0.49975
Prim1	3.93183e-192	-0.499756
Tk1	1.59132e-188	-0.502573
Ckap2l	2.35243e-198	-0.503699
Ncapd2	1.21865e-231	-0.50378
Fen1	8.20661e-193	-0.504353
Supt16	4.03966e-164	-0.504867
Ccdc34	2.93687e-175	-0.509473
Alyref	1.45742e-178	-0.51524
Orc6	6.85159e-181	-0.516197
Mcm4	2.28124e-124	-0.517263
Arl6ip1	1.17148e-52	-0.517594
Hmgn2	9.63974e-151	-0.519605
Rad21	2.48435e-151	-0.521152
Bub1b	2.13469e-197	-0.523231
Rbbp7	1.27531e-174	-0.523823
Kif15	3.98447e-212	-0.532615
Kif20b	6.15786e-182	-0.533999
Atad5	7.61017e-217	-0.538884
E2f8	3.22746e-234	-0.541267
Kif23	1.27804e-201	-0.542502
Hmmr	1.74544e-162	-0.543151
Hirip3	8.54083e-200	-0.547922
Racgap1	3.80732e-177	-0.548888
Cit	1.57306e-198	-0.55395
Dctpp1	2.97047e-192	-0.556221
Rad51ap1	1.62479e-243	-0.564155
Tyms	3.17298e-199	-0.567185
Ncapd3	8.1797e-255	-0.56945
Sgol2a	6.06883e-210	-0.569695
Ssrp1	3.01495e-215	-0.576395
Tagln2	5.72348e-190	-0.577957
Cenpm	3.43468e-227	-0.581737
Spc25	2.04801e-245	-0.582102
H2afv	5.58381e-161	-0.584307
Chaf1a	7.60259e-215	-0.584853
Mcm6	9.86222e-123	-0.586354
Ncapg	2.4589e-220	-0.593642
Atad2	8.74208e-188	-0.59853
Mis18bp1	1.13015e-208	-0.603397
Calm2	1.69565e-148	-0.606806
Bub3	1.25805e-149	-0.607464
Usp1	8.70985e-219	-0.608687
Ncapg2	6.07038e-248	-0.612285
Siva1	1.38572e-206	-0.613599
Tipin	1.80394e-227	-0.617036
Whsc1	7.7119e-199	-0.621279
Rfc4	3.72481e-245	-0.626268
Cdca3	2.42976e-218	-0.627019
Cdca2	1.96524e-215	-0.62807
Snrpd1	2.6082e-250	-0.630962
Cks2	3.84366e-166	-0.635757
Slbp	2.3053e-168	-0.642539
Cks1b	2.23324e-196	-0.642616
Ran	5.69353e-261	-0.649359
Dnajc9	1.08014e-241	-0.653996
Cenpe	5.1198e-167	-0.66043
Hnrnpab	2.398e-248	-0.665282
Hsp90aa1	1.29395e-259	-0.665822
Casc5	9.88609e-225	-0.667219
Tpx2	2.57864e-191	-0.670824
Smc1a	3.86872e-239	-0.681014
Mcm3	2.43408e-202	-0.686004
Hells	7.30255e-220	-0.702061
Nucks1	1.53802e-215	-0.703921
Aurkb	1.49072e-233	-0.704992
Cbx5	1.64438e-276	-0.712953
Dhfr	2.58245e-226	-0.725327
Cdca8	3.0936e-183	-0.727115
Hmgb1	1.79666e-263	-0.733019
Gmnn	4.1381e-289	-0.750392
Rrm1	1.59591e-299	-0.752996
Nasp	7.34891e-259	-0.754683
Hist1h1e	6.58758e-166	-0.761725
Mcm7	1.17808e-288	-0.769005
Ezh2	1.14265e-278	-0.789201
Ranbp1	1.69436e-261	-0.805436
Lmnb1	5.05417e-273	-0.806778
Dnmt1	1.31749e-285	-0.810731
Mcm5	4.49702e-282	-0.823896
Tmpo	1.86804e-300	-0.824889
Uhrf1	7.58399e-281	-0.839073
Tubb4b	1.22708e-213	-0.846749
Kif11	4.16791e-282	-0.855572
Dek	0	-0.859424
Asf1b	0	-0.860837
Fbxo5	0	-0.872678
Spc24	4.86938e-302	-0.876959
Ube2s	3.21695e-233	-0.885589
Birc5	1.80554e-215	-0.891475
Lig1	6.12699e-297	-0.909695
Hmgb2	1.03543e-268	-0.921245
Ccna2	1.93984e-275	-0.951835
Ube2c	1.82964e-113	-0.957017
Cenpf	4.16315e-179	-0.972326
Cdk1	0	-0.973961
Incenp	4.80524e-272	-0.979362
Smc4	1.68963e-258	-0.98933
Rrm2	1.48427e-289	-1.00003
Ptma	0	-1.01059
Esco2	0	-1.01412
Prc1	3.08648e-296	-1.02404
Dut	0	-1.03546
Clspn	0	-1.07823
H2afz	0	-1.08939
Smc2	0	-1.1011
Hist1h2ae	3.19836e-246	-1.12631
Nusap1	0	-1.1379
H2afx	3.68671e-180	-1.20092
Stmn1	0	-1.31915
Tuba1b	0	-1.36825
Mki67	0	-1.47347
Tubb5	0	-1.52212
2810417H13Rik	0	-1.76478
Top2a	0	-1.87819
Hist1h1b	5.19726e-308	-1.91644
Hist1h2ap	1.22678e-300	-2.5248
